# Supplementary material for: Gendered Protest in Europe: EU Norm Diffusion, Conservative Backlash, and Attitudinal Hybridization
Source: Research Square preprint supplement (doi:10.21203/rs.3.rs-7829158/v1), 2025-10-13
Supplement: Supplementary file 1 [file 753d5fa34eb8319e9d684426.docx]

**Appendix 1. EU Norm Diffusion, Conservative Counter-Mobilization, and Gender Gaps in Protest Participation (Hypothesis 1)**

| **Predictor** | **Low-effort only** | **High-effort only** | **Mixed-effort** |
| --- | --- | --- | --- |
| Conservative counter-mobilization (CCM) | 0.160***(0.033) | -0.179*** (0.052) | 0.082**(0.026) |
| Liberal democracy index (LDI) | 0.689*** (0.051) | 0.466*** (0.071) | 0.737*** (0.038) |
| Female | 0.068† (0.040) | -0.374*** (0.058) | -0.237***(0.030) |
| Female × CCM | 0.138** (0.042) | 0.107 (0.070) | 0.038 (0.034) |
| CCM × LDI | -0.292*** (0.050) | -0.007 (0.079) | -0.239*** (0.040) |
| Female × LDI | -0.123* (0.059) | -0.139 (0.087) | -0.130** (0.045) |
| Female × CCM × LDI | -0.141* (0.064) | -0.171 (0.109) | 0.048 (0.052) |
| **Gender role-attitudes (ref: Traditional)** |  |  |  |
| Public-egalitarian | -0.112† (0.064) | 0.070 (0.104) | -0.183** (0.055) |
| Mixed-egalitarian | 0.125** (0.038) | 0.159* (0.065) | 0.307*** (0.033) |
| Ambivalent-traditional | 0.136** (0.041) | -0.041 (0.071) | 0.201*** (0.035) |
| Egalitarian | 0.117* (0.048) | 0.107 (0.084) | 0.426*** (0.041) |
| **Controls** |  |  |  |
| Parliamentary seats – conservatives | -0.003 (0.089) | 0.972*** (0.159) | 0.661*** (0.076) |
| GDP per capita (log) | 0.505*** (0.027) | 0.101* (0.047) | 0.438*** (0.024) |
| Years since EU accession | 0.013*** (0.001) | 0.008*** (0.002) | 0.017*** (0.001) |
| Employment status | -0.021** (0.007) | -0.031** (0.012) | -0.043*** (0.006) |
| Education (years) | 0.085*** (0.008) | 0.069*** (0.013) | 0.181*** (0.007) |
| Age (continuous) | -0.010*** (0.001) | -0.012*** (0.002) | -0.033*** (0.001) |
| Political interest | 0.358*** (0.016) | 0.372*** (0.027) | 0.717*** (0.014) |
| Social trust | 0.036 (0.032) | -0.070 (0.056) | 0.296*** (0.027) |
| Constant | -1.489*** (0.084) | -2.281*** (0.140) | -0.701*** (0.070) |

**Notes:** Coefficients with robust standard errors in parentheses. † *p* < 0.10; * *p* < 0.05;

** *p* < 0.01; *** *p* < 0.001.

Base outcome = *No participation*. Reference category for gender-role attitudes = Traditionalist

Number of observations = 61,409. LR χ²(60) = 15,854; Pseudo R² = 0.120.
