# Supplementary material for: Gendered Protest in Europe: EU Norm Diffusion, Conservative Backlash, and Attitudinal Hybridization
Source: Research Square preprint supplement (doi:10.21203/rs.3.rs-7829158/v1), 2025-10-13
Supplement: Supplementary file 2 [file 9fd12652464102c269b8c976.docx]

**Appendix 2. Hybridization of Gender-Role Attitudes under EU Norm Diffusion and Conservative Counter-Mobilization (Hypothesis 2)**

| **Predictor** | **Low-effort only** | **High-effort only** | **Mixed-effort** |
| --- | --- | --- | --- |
| Conservative counter-mobilization (CCM) | 0.104* (0.051) | -0.085 (0.088) | 0.011 (0.044) |
| Liberal democracy index (LDI) | 0.615*** (0.078) | 0.151 (0.119) | 0.445*** (0.063) |
| **Gender role-attitudes (ref: Traditional)** |  |  |  |
| Public-egalitarian | -0.229 (0.172) | -0.283 (0.233) | -0.300* (0.136) |
| Mixed-egalitarian | -0.136 (0.094) | -0.185 (0.134) | -0.017 (0.076) |
| Ambivalent-traditional | -0.125 (0.102) | -0.375** (0.147) | 0.015 (0.081) |
| Egalitarian | -0.260* (0.125) | -0.309† (0.182) | -0.144 (0.103) |
| **Gender-role attitudes × LDI** |  |  |  |
| Public-egalitarian × LDI | -0.327† (0.174) | -0.038 (0.257) | 0.132 (0.149) |
| Mixed-egalitarian × LDI | 0.037 (0.096) | -0.093 (0.140) | 0.213** (0.075) |
| Ambivalent-traditional × LDI | 0.047 (0.112) | 0.048 (0.167) | 0.169† (0.089) |
| Egalitarian × LDI | 0.163 (0.120) | 0.226 (0.175) | 0.521*** (0.090) |
| **Gender-role attitudes× CCM** |  |  |  |
| Public-egalitarian × CCM | 0.134 (0.136) | -0.199 (0.185) | 0.120 (0.112) |
| Mixed-egalitarian × CCM | 0.130* (0.065) | -0.068 (0.112) | 0.145** (0.055) |
| Ambivalent-traditional × CCM | -0.156† (0.085) | 0.103 (0.131) | 0.003 (0.068) |
| Egalitarian × CCM | 0.263** (0.089) | -0.181 (0.189) | 0.080 (0.077) |
| **Triple interactions (Attitudes × LDI × CCM)** |  |  |  |
| Public-egalitarian × LDI × CCM | -0.260 (0.216) | 0.199 (0.321) | -0.153 (0.182) |
| Mixed-egalitarian × LDI × CCM | -0.259* (0.106) | 0.147 (0.186) | -0.130 (0.090) |
| Ambivalent-traditional × LDI × CCM | 0.000 (0.133) | 0.169 (0.211) | -0.022 (0.110) |
| Egalitarian × LDI × CCM | -0.366** (0.134) | 0.212 (0.289) | -0.033 (0.114) |
| Female | -0.086 (0.086) | -0.932*** (0.149) | -0.447*** (0.075) |
| **Female × Gender-role attitudes** |  |  |  |
| Female × Public-egalitarian | 0.527** (0.190) | 0.737* (0.306) | 0.336* (0.165) |
| Female × Mixed-egalitarian | 0.233* (0.112) | 0.595** (0.193) | 0.253** (0.097) |
| Female × Ambivalent-traditional | 0.328** (0.118) | 0.619** (0.209) | 0.114 (0.103) |
| Female × Egalitarian | 0.307* (0.143) | 0.786*** (0.241) | 0.413*** (0.125) |
| **Controls** |  |  |  |
| Parliamentary seats: conservatives | -0.081*** (0.020) | 0.107** (0.039) | 0.013 (0.018) |
| GDP per capita (log) | 0.792*** (0.040) | -0.089 (0.087) | 0.471*** (0.037) |
| Years since EU accession | 0.015*** (0.001) | 0.019*** (0.003) | 0.029*** (0.001) |
| Employment status | -0.046*** (0.010) | -0.023 (0.018) | -0.065*** (0.009) |
| Education | 0.109*** (0.011) | 0.082*** (0.020) | 0.196*** (0.010) |
| Age | -0.010*** (0.002) | -0.013*** (0.003) | -0.034*** (0.001) |
| Political interest | 0.373*** (0.024) | 0.358*** (0.041) | 0.807*** (0.021) |
| Social trust | -0.080† (0.048) | -0.168† (0.088) | 0.227*** (0.041) |
| Constant | -1.222*** (0.135) | -2.154*** (0.214) | -0.700*** (0.113) |

**Notes:** Coefficients with robust standard errors in parentheses. † *p* < 0.10; * *p* < 0.05;

** *p* < 0.01; *** *p* < 0.001.

Base outcome = *No participation*.

Number of observations = 61,409.

Wald χ²(96) = 7,718.2; Pseudo R² = 0.144.
